# Supplementary material for: Mental Health Service Utilization Among Natural Disaster Survivors With Perceived Need for Services
Source: Atypon-hosted journal article supplement (doi:10.1176/appi.ps.201500027), 2015-11-02
Supplement: appi.ps.201500027.ds001.pdf [file appi.ps.201500027.ds001.pdf]

*Supplementary Table 1. Descriptive Information for Predisposing, Illness-Related and Enabling Factors at Each Wave*

|                                 | <i>Wave 1</i><br>( <i>n=658</i> ) |           | <i>Wave 2</i><br>( <i>n=529</i> ) |           | <i>Wave 3</i><br>( <i>n=487</i> ) |           |
|---------------------------------|-----------------------------------|-----------|-----------------------------------|-----------|-----------------------------------|-----------|
|                                 | <i>M or %</i>                     | <i>SD</i> | <i>M or %</i>                     | <i>SD</i> | <i>M or %</i>                     | <i>SD</i> |
| <i>Predisposing Factors</i>     |                                   |           |                                   |           |                                   |           |
| Age                             | 49.92                             | 18.08     | --                                | --        | --                                | --        |
| Male gender                     | 59.9%                             | --        | --                                | --        | --                                | --        |
| Non-Hispanic Black              | 15.4%                             | --        | --                                | --        | --                                | --        |
| Hispanic                        | 19.1%                             | --        | --                                | --        | --                                | --        |
| Single, never married           | 23.4%                             | --        | --                                | --        | --                                | --        |
| Separated, widowed, or divorced | 29.5%                             | --        | --                                | --        | --                                | --        |
| Parent of children < 18 years   | 76.6%                             | --        | --                                | --        | --                                | --        |
| Predisaster employment          | 57.8%                             | --        | --                                | --        | --                                | --        |
| Predisaster probable PTSD       | 12.3%                             | --        | --                                | --        | --                                | --        |
| Predisaster probable MDD        | 18.9%                             | --        | --                                | --        | --                                | --        |
| Predisaster probable GAD        | 11.3%                             | --        | --                                | --        | --                                | --        |
| Disaster-related trauma         | .14                               | .41       | --                                | --        | --                                | --        |
| Disaster-related stressors      | 3.09                              | 1.75      | --                                | --        | --                                | --        |
| General trauma                  | .09                               | .32       | .25                               | .62       | .54                               | .85       |
| General stressors               | .30                               | .67       | .91                               | 1.31      | 1.38                              | 1.70      |
| <i>Illness Factors</i>          |                                   |           |                                   |           |                                   |           |
| Posttraumatic stress            | 27.46                             | 13.52     | 24.03                             | 10.77     | 25.20                             | 12.39     |
| Depression                      | 2.10                              | 4.41      | 1.84                              | 3.84      | 2.01                              | 4.05      |
| Generalized anxiety             | 1.57                              | 3.50      | 1.27                              | 3.13      | 1.28                              | 2.93      |
| Quality of life                 | 45.81                             | 10.58     | 47.50                             | 10.33     | 48.14                             | 10.39     |
| <i>Enabling Factors</i>         |                                   |           |                                   |           |                                   |           |
| Insurance coverage              | 82.0%                             | --        | 82.3%                             | --        | 83.2%                             | --        |
| Past-week employment            | 55.3%                             | --        | 50.4%                             | --        | 49.9%                             | --        |
| Emotional support               | 9.59                              | 2.57      | 9.48                              | 2.58      | 9.47                              | 2.67      |
| Informational support           | 7.19                              | 2.74      | 6.98                              | 2.74      | 7.24                              | 2.71      |
| Tangible support                | 11.00                             | 3.72      | 9.40                              | 3.56      | 10.03                             | 3.71      |

*Note.* PTSD = posttraumatic stress disorder; MDD = major depressive Disorder; GAD = generalized anxiety disorder.

*Supplementary Table 2. Number and Percentage of Participants Reporting Perceived Mental Health Service Needs at Each Wave*

|                                    | <i>Wave 1</i><br><i>n=658</i> |          | <i>Wave 2</i><br><i>n=529</i> |          | <i>Wave 3</i><br><i>n=487</i> |          |
|------------------------------------|-------------------------------|----------|-------------------------------|----------|-------------------------------|----------|
|                                    | <i>n</i>                      | <i>%</i> | <i>n</i>                      | <i>%</i> | <i>n</i>                      | <i>%</i> |
| Information about stress reactions | 71                            | 10.8%    | 43                            | 8.1%     | 54                            | 11.1%    |
| Medication for emotional problems  | 78                            | 11.9%    | 58                            | 11.0%    | 74                            | 15.2%    |
| Discuss causes of stress           | 52                            | 8.2%     | 42                            | 7.9%     | 63                            | 12.9%    |
| Change thoughts or feelings        | 117                           | 17.8%    | 89                            | 16.8%    | 118                           | 24.2%    |
| Talk through problems              | 146                           | 22.2%    | 92                            | 17.4%    | 119                           | 24.4%    |
| Any need                           | 210                           | 31.9%    | 141                           | 26.7%    | 172                           | 35.3%    |

*Supplemental Table 3. Number and Percentage of Participants Reporting Mental Health Service Use among Participants with a Perceived Need for Services at Each Wave (n=304)*

|                                     | <i>Wave 1</i><br><i>n = 210</i> |          | <i>Wave 2</i><br><i>n = 141</i> |          | <i>Wave 3</i><br><i>n = 172</i> |          |
|-------------------------------------|---------------------------------|----------|---------------------------------|----------|---------------------------------|----------|
|                                     | <i>n</i>                        | <i>%</i> | <i>n</i>                        | <i>%</i> | <i>n</i>                        | <i>%</i> |
| Physician                           | 21                              | 10.0%    | 34                              | 24.1%    | 27                              | 15.7%    |
| Psychiatrist                        | 14                              | 6.7%     | 16                              | 11.3%    | 19                              | 11.0%    |
| Psychologist                        | 4                               | 1.9%     | 3                               | 2.1%     | 10                              | 5.8%     |
| Minister or spiritual advisor       | 11                              | 5.2%     | 11                              | 7.8%     | 13                              | 7.6%     |
| Crisis counselor or outreach worker | 4                               | 1.9%     | 0                               | 0.0%     | 5                               | 2.9%     |
| Other mental health professional    | 4                               | 1.9%     | 2                               | 1.4%     | 13                              | 7.6%     |
| Self-help group                     | 4                               | 1.9%     | 4                               | 2.8%     | 8                               | 4.7%     |
| Self-help information               | 2                               | 1.0%     | 3                               | 2.1%     | 4                               | 2.3%     |
| Used any of <i>listed</i> services  | 51                              | 24.3%    | 56                              | 39.7%    | 68                              | 39.5%    |
| Used <i>any</i> service             | 78                              | 37.1%    | 67                              | 47.5%    | 77                              | 44.8%    |
